# Supplementary material for: Characterization of Room-Temperature Ionic Liquids to Study the Electrochemical Activity of Nitro Compounds
Source: Sensors (Basel). 2020 Feb 19;20(4):1124. doi: 10.3390/s20041124 (PMC7070553; doi:10.3390/s20041124)
Supplement: Supplementary file 1 [file sensors-20-01124-s001.pdf]

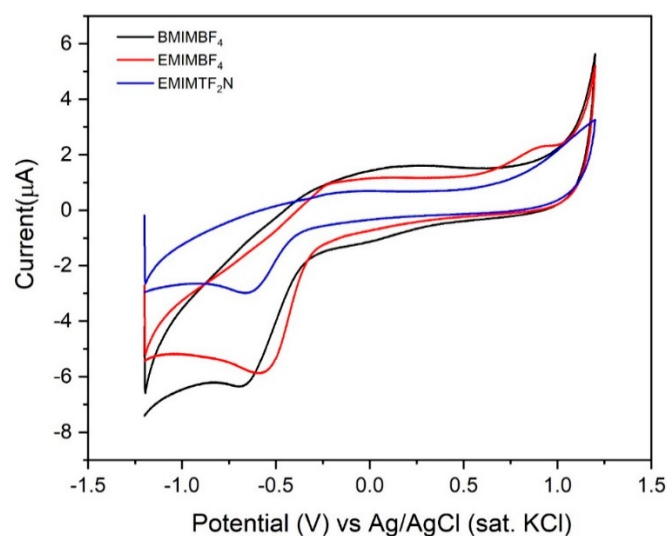

**Figure S1.** Cyclic voltammetry (CV) output of room-temperature ionic liquid (RTIL)-modified glassy carbon electrode (GCE) without analyte.

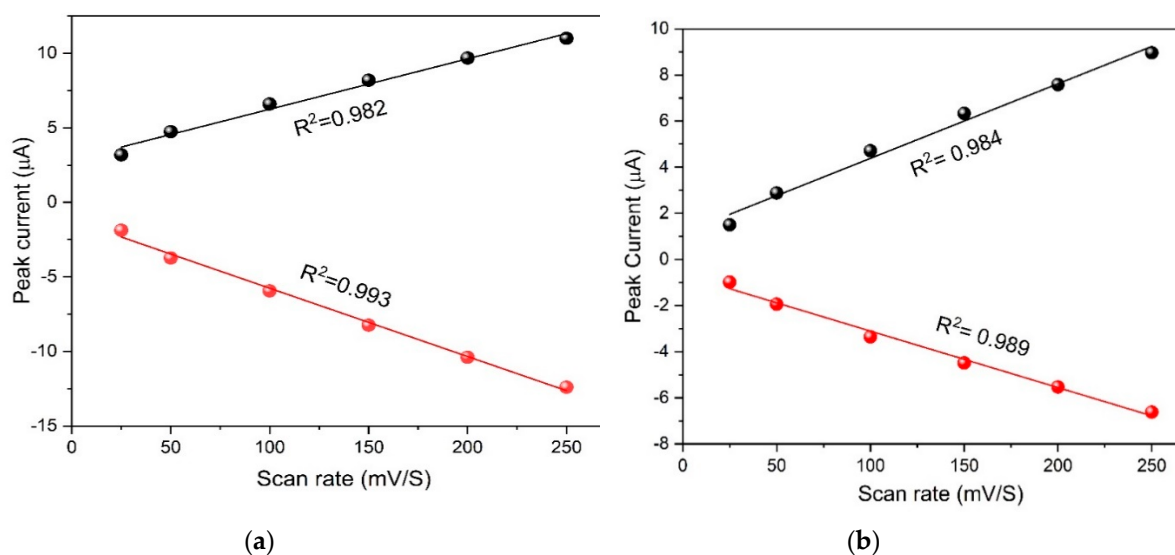

**Figure S2.** (a) The peak current vs. scan rate with  $R^2$  for 2,6-dinitrotoluene (2,6 DNT); (b) The peak current vs. scan rate with  $R^2$  for ethylnitrobenzene (ENB).

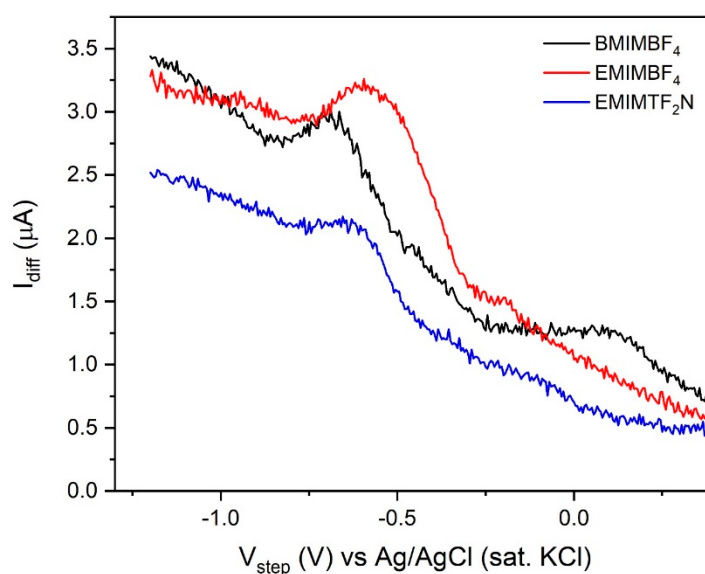

**Figure S3.** Square wave voltammetry (SQWV) was performed using different RTILs in the absence of the target analyte to obtain the baseline peak current. SQWV parameter: frequency 25 Hz, amplitude of 25 mV and step size of 5 mV.

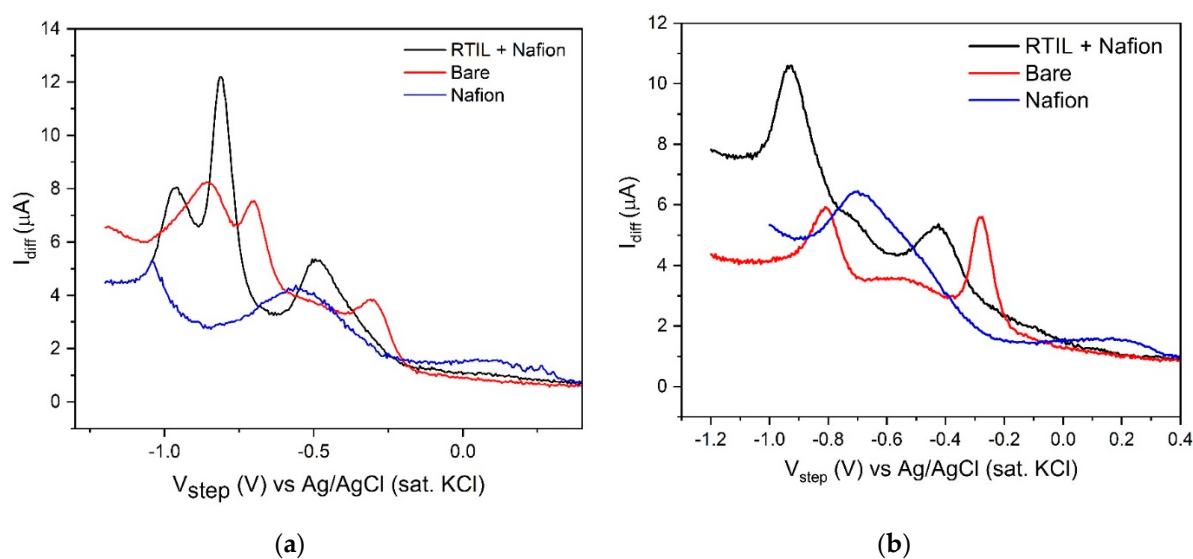

**Figure S4.** (a) SQWV output of RTIL ([EMIM][BF<sub>4</sub>)]-nafion modified GCE, bare electrode and nafion-GCE for detection of 100 ppm 2,6 DNT; (b) SQWV output of RTIL ([EMIM][BF<sub>4</sub>)]-nafion modified GCE, bare electrode and nafion-GCE for detection of 100 ppm ENB.

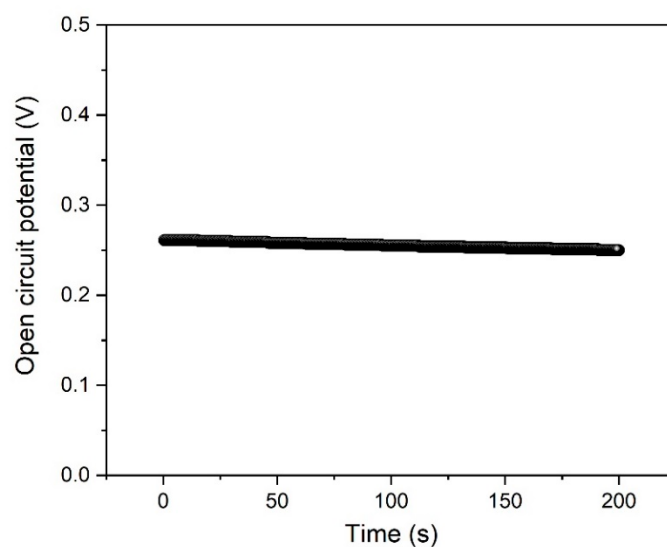

**Figure S5.** Open circuit potential measurement to show the stability of the fabricated sensor. The sensor is stable for over 200 s with the OCP in the lower millivolt regime.

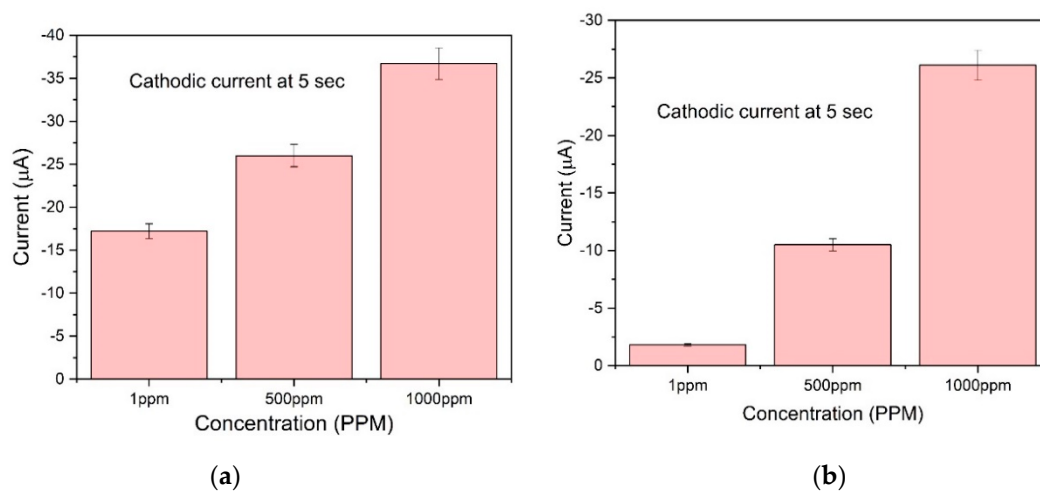

**Figure S6.** (a) Calibration dose response plotted for 2,6 DNT concentrations of 1, 500 and 1000 ppm in terms of steady state current at 5 sec; (b) Calibration dose response plotted for ENB concentrations of 1, 500 and 1000 ppm in terms of steady state current at 5 sec.

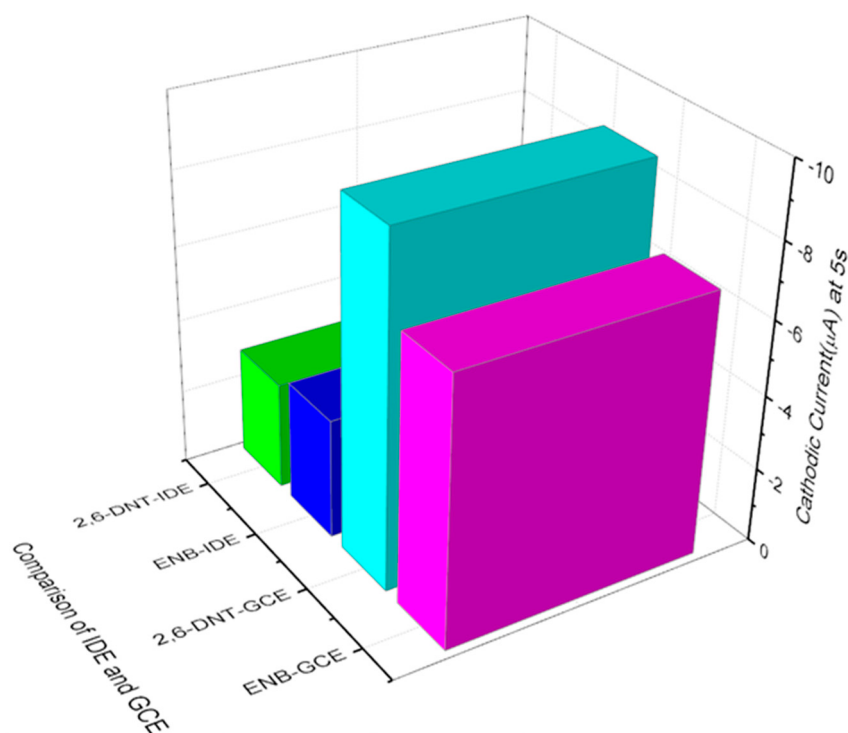

**Figure S7.** Comparison of the current obtained at 5 s for interdigitated electrode (IDE) vs. GCE for both the target analytes.

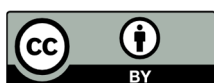

© 2020 by the authors. Licensee MDPI, Basel, Switzerland. This article is an open access article distributed under the terms and conditions of the Creative Commons Attribution (CC BY) license (<http://creativecommons.org/licenses/by/4.0/>).
